# Supplementary material for: Cu2−xSe nanooctahedra: controllable synthesis and optoelectronic properties
Source: Royal Society of Chemistry journal article supplement (doi:10.1039/c4ce02343a), 2015-01-01
Supplement: c4ce02343a1.pdf [file c4ce02343a1.pdf]

# Electronic Supplementary Information (ESI)

## **Cu<sub>2-x</sub>Se nanooctahedra: controllable synthesis and optoelectronic properties**

Wenliang Wang,<sup>a,b,c,d</sup> Li Zhang,<sup>a,b,c,d</sup> Guihuan Chen,<sup>a,b,c,d</sup> Jun Jiang,<sup>a,b,c,d</sup> Tao Ding,<sup>a,b,c,d</sup> Jian Zuo<sup>a</sup> and Qing Yang<sup>\*a,b,c,d</sup>

<sup>a</sup> Hefei National Laboratory of Physical Sciences at the Microscale, University of Science and Technology of China (USTC), Hefei 230026, Anhui, P. R. China.

<sup>b</sup> Department of Chemistry, USTC, Hefei 230026, Anhui, P. R. China.

<sup>c</sup> Laboratory of Nanomaterials for Energy Conversion, USTC, Hefei 230026, Anhui, P. R. China.

<sup>d</sup> Synergetic Innovation Center of Quantum Information & Quantum Physics, USTC, Hefei 230026, P. R. China

\* Corresponding author. E-mail: qyoung@ustc.edu.cn; Fax: +86-551-63606266; Tel: +86-551-63600243.

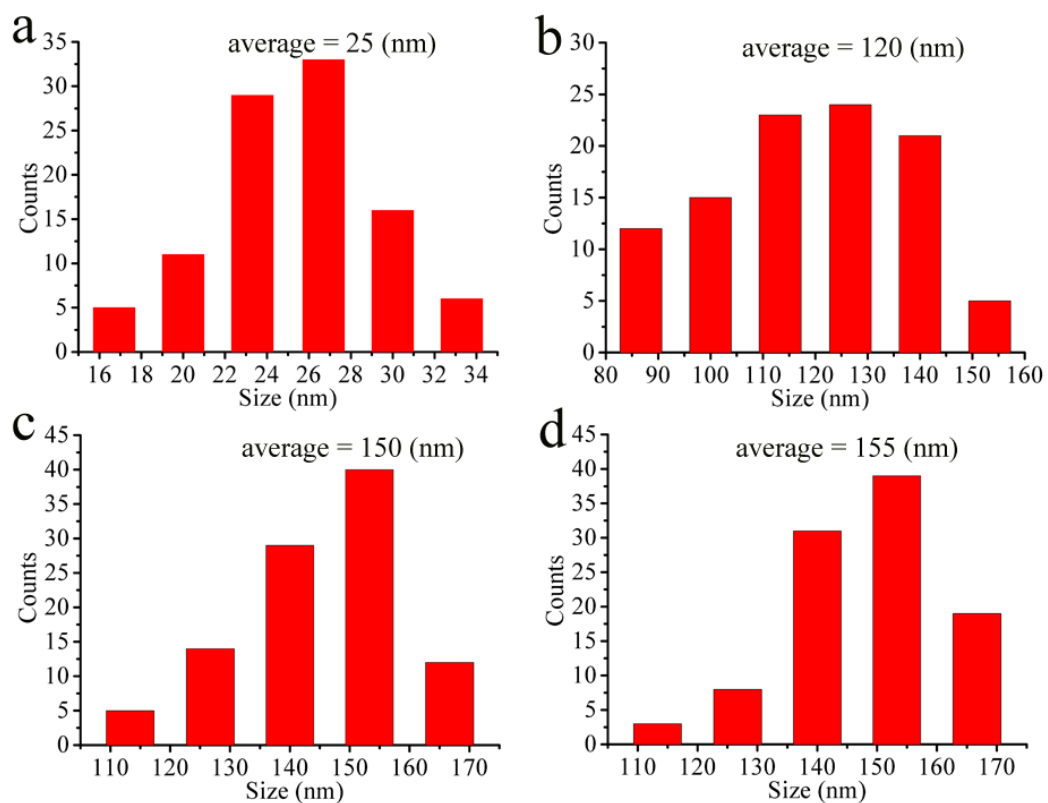

**Fig. S1.** Size distribution of the  $\text{Cu}_{2-x}\text{Se}$  NCs synthesized by injection of 1.0 mL ODE containing 0.1 mmol  $\text{Ph}_2\text{Se}_2$  into 6 mL ODE and 0.5 mL OAm with 0.2 mmol  $\text{CuCl}$  at 270 °C with different reaction time: (a) 30 sec, (b) 5 min, (c) 45 min, and (d) 60min.

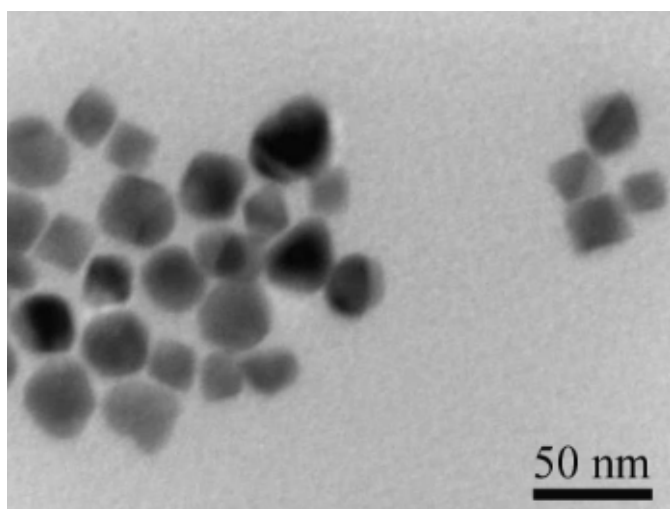

**Fig. S2.** TEM image of the products prepared at 270 °C in ODE (7.0 mL) and OAm (0.5 mL) for 30 sec.

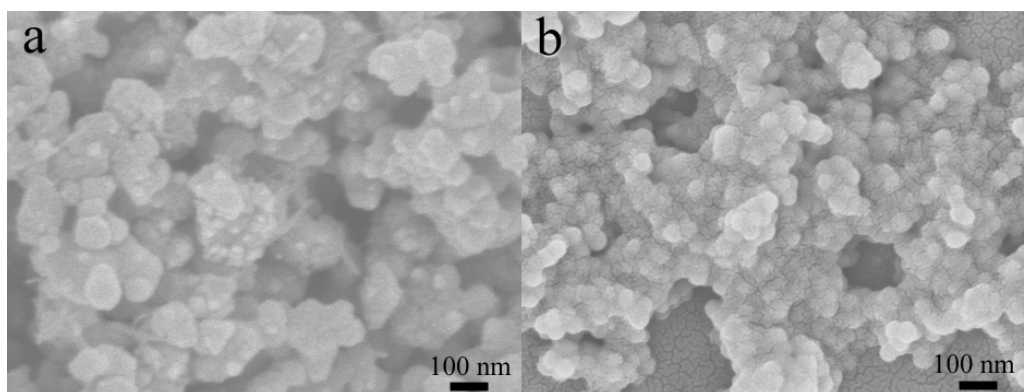

**Fig. S3.** SEM images of the products prepared at 270 °C for 30 min in (a) pure ODE (7.5 mL), and (b) pure OAm (7.5 mL), respectively.

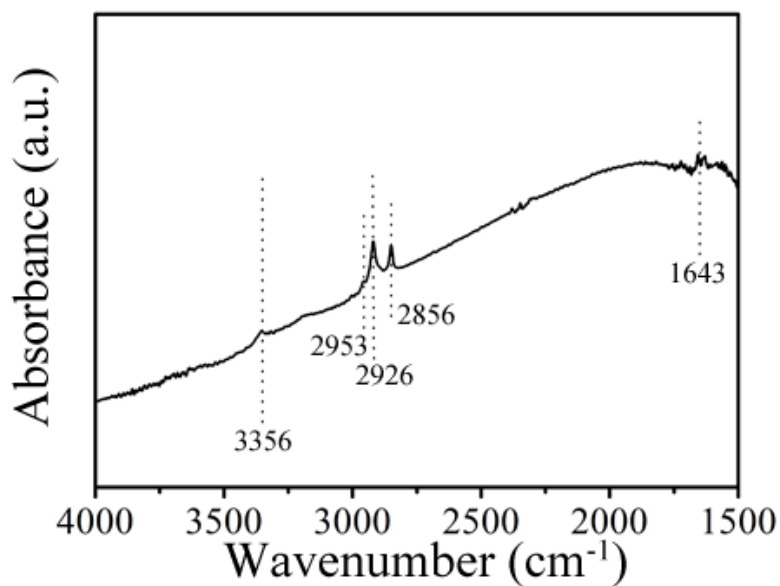

**Fig. S4.** ATR-FTIR spectrum for the as-synthesized octahedral  $\text{Cu}_{2-x}\text{Se}$  NCs.

ATR-FTIR is demonstrated to further characterize the capping agent binding to the surface of the as-synthesized octahedral  $\text{Cu}_{2-x}\text{Se}$  NCs obtained in a mixture media of ODE (7.0 mL) with OAm (0.5 mL). In Fig. S4, the absorbance bands at 2856, 2926 and 2953  $\text{cm}^{-1}$  can be assigned to the C–H stretching modes.<sup>1</sup> The IR absorbance band at 3356  $\text{cm}^{-1}$  is attributed to the stretching mode of N–H bond. Moreover, a small band peak at 1643  $\text{cm}^{-1}$  is observed, revealing the existence of OAm on the  $\text{Cu}_{2-x}\text{Se}$  NCs surface as well.<sup>2,3</sup> Therefore, it is suggested that the capping effect of the media, especially OAm, promotes the growth of the  $\text{Cu}_{2-x}\text{Se}$  NCs with well-defined octahedral shapes.

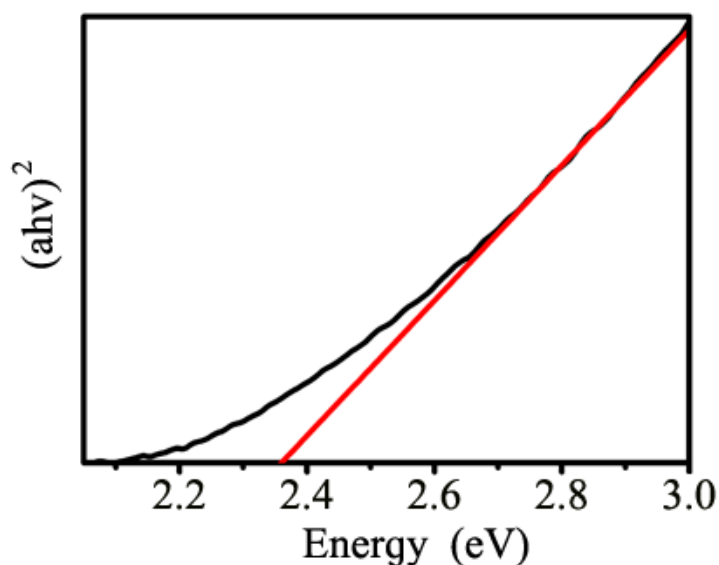

**Fig. S5.** Plot the direct band gap of the octahedral  $\text{Cu}_{2-x}\text{Se}$  NCs derived from UV-vis-NIR absorption spectrum.

#### Supplementary References

1. P. J. Thistlethwaite and M. S. Hook, *Langmuir*, 2000, **16**, 4993-4998.
2. X. Lu, H.-Y. Tuan, J. Chen, Z.-Y. Li, B. A. Korgel and Y. Xia, *J. Am. Chem. Soc.*, 2007, **129**, 1733-1742.
3. G. Shao, G. Chen, W. Yang, T. Ding, J. Zuo and Q. Yang, *Langmuir*, 2014, **30**, 2863-2872.
